# Supplementary material for: Alcoholic hepatitis accelerates early hepatobiliary cancer by increasing stemness and miR-122-mediated HIF-1α activation
Source: PubMed Central journal article supplement (PMC4758032; doi:10.1038/srep21340), 2016-02-18
Supplement: srep21340-s1.pdf [file srep21340-s1.pdf]

## **Supplementary Information**

### **Alcoholic hepatitis accelerates early hepatobiliary cancer by increasing stemness and miR-122-mediated HIF-1 $\alpha$ activation**

Aditya Ambade, Abhishek Satishchandran, Gyongyi Szabo<sup>\*</sup>

Department of Medicine, University of Massachusetts Medical School, Worcester, MA  
01604. United States.

## Supplementary Figure 1

### Experimental design:

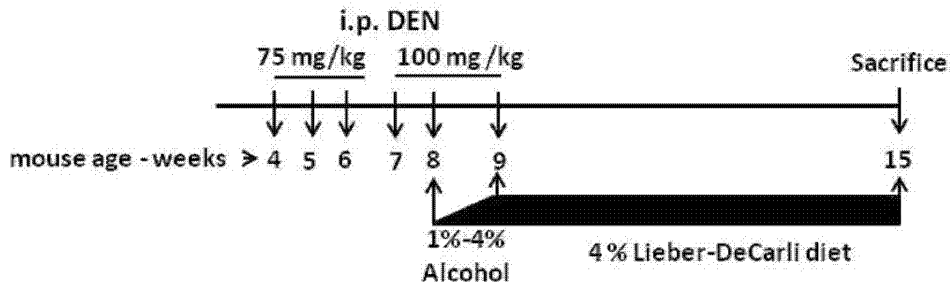

**Supplementary Figure S1.** Experimental design of alcohol accelerated model of hepatobiliary neoplasia (n ≥ 5 mice per group).

## Supplementary Figure 2

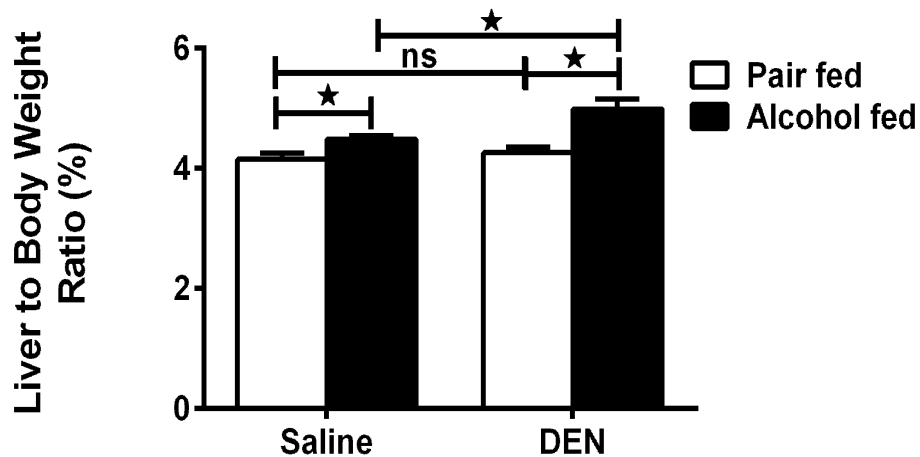

**Supplementary figure S2.** Liver to body weight ratio at the time of sacrifice. In the graph, values are given as average ± SD, ANOVA and Dunnett's multiple comparison were used to compare the means of multiple groups; (\*p<0.05).
